# Supplementary material
Source: publisher figshare collection journal article supplement (https://acs.figshare.com/ndownloader/files/5401007)
Supplement: Supplementary file 1 [file 5401007]

data_160317_3e_bai1601072
_audit_creation_date              2016-03-18
_audit_creation_method
;
Olex2 1.2
(compiled 2014.03.20 svn.r2914 for OlexSys, GUI svn.r4816)
;
_publ_contact_author_address      ?
_publ_contact_author_email        ?
_publ_contact_author_name         ''
_publ_contact_author_phone        ?
_publ_section_references
;
Dolomanov, O.V., Bourhis, L.J., Gildea, R.J, Howard, J.A.K. & Puschmann, H.
 (2009), J. Appl. Cryst. 42, 339-341.

Sheldrick, G.M. (2008). Acta Cryst. A64, 112-122.
;
_chemical_name_common             ?
_chemical_name_systematic
;
 ? 
;
_chemical_formula_moiety          'C17 H14 Cl N O3, C H Cl3'
_chemical_formula_sum             'C18 H15 Cl4 N O3'
_chemical_formula_weight          435.11
_chemical_melting_point           ?
_chemical_oxdiff_formula          'c10 h10 n2 o8 Cl1'
loop_
  _atom_type_symbol
  _atom_type_description
  _atom_type_scat_dispersion_real
  _atom_type_scat_dispersion_imag
  _atom_type_scat_source
 'C' 'C' 0.0033 0.0016 'International Tables Vol C Tables 4.2.6.8 and 6.1.1.4'
 'H' 'H' 0.0000 0.0000 'International Tables Vol C Tables 4.2.6.8 and 6.1.1.4'
 'Cl' 'Cl' 0.1484 0.1585 'International Tables Vol C Tables 4.2.6.8 and 6.1.1.4'
 'N' 'N' 0.0061 0.0033 'International Tables Vol C Tables 4.2.6.8 and 6.1.1.4'
 'O' 'O' 0.0106 0.0060 'International Tables Vol C Tables 4.2.6.8 and 6.1.1.4'

_space_group_crystal_system       'triclinic'
_space_group_IT_number            2
_space_group_name_H-M_alt         'P -1'
_space_group_name_Hall            '-P 1'
loop_
  _space_group_symop_id
  _space_group_symop_operation_xyz
 1 'x, y, z'
 2 '-x, -y, -z'

_cell_length_a                    7.9118(6)
_cell_length_b                    11.5272(10)
_cell_length_c                    11.8921(10)
_cell_angle_alpha                 68.353(8)
_cell_angle_beta                  88.982(7)
_cell_angle_gamma                 82.872(7)
_cell_volume                      999.82(14)
_cell_formula_units_Z             2
_cell_measurement_reflns_used     1505
_cell_measurement_temperature     293(2)
_cell_measurement_theta_max       29.3906
_cell_measurement_theta_min       3.4098
_exptl_absorpt_coefficient_mu     0.609
_exptl_absorpt_correction_T_max   1.00000
_exptl_absorpt_correction_T_min   0.90894
_exptl_absorpt_correction_type    multi-scan
_exptl_absorpt_process_details
;
CrysAlisPro, Agilent Technologies,
Version 1.171.35.11 (release 16-05-2011 CrysAlis171 .NET)
(compiled May 16 2011,17:55:39)
Empirical absorption correction using spherical harmonics,
 implemented in SCALE3 ABSPACK scaling algorithm.
;
_exptl_crystal_colour             colourless
_exptl_crystal_colour_primary     colourless
_exptl_crystal_density_diffrn     1.445
_exptl_crystal_density_meas       ?
_exptl_crystal_density_method     'not measured'
_exptl_crystal_description        block
_exptl_crystal_F_000              444
_exptl_crystal_size_max           0.48
_exptl_crystal_size_mid           0.43
_exptl_crystal_size_min           0.36
_exptl_special_details
;
 ? 
;
_diffrn_reflns_av_R_equivalents   0.0274
_diffrn_reflns_av_unetI/netI      0.0459
_diffrn_reflns_limit_h_max        9
_diffrn_reflns_limit_h_min        -9
_diffrn_reflns_limit_k_max        11
_diffrn_reflns_limit_k_min        -13
_diffrn_reflns_limit_l_max        14
_diffrn_reflns_limit_l_min        -14
_diffrn_reflns_number             6296
_diffrn_reflns_theta_full         25.35
_diffrn_reflns_theta_max          25.35
_diffrn_reflns_theta_min          3.42
_diffrn_ambient_temperature       293.15
_diffrn_detector_area_resol_mean  10.3592
_diffrn_measured_fraction_theta_full 0.996
_diffrn_measured_fraction_theta_max 0.996
_diffrn_measurement_device_type   'Xcalibur, Atlas, Gemini ultra'
_diffrn_measurement_method        '\w scans'
_diffrn_orient_matrix_UB_11       -0.0604963000
_diffrn_orient_matrix_UB_12       -0.0419541000
_diffrn_orient_matrix_UB_13       0.0268797000
_diffrn_orient_matrix_UB_21       0.0659285000
_diffrn_orient_matrix_UB_22       -0.0450654000
_diffrn_orient_matrix_UB_23       0.0362180000
_diffrn_orient_matrix_UB_31       -0.0128136000
_diffrn_orient_matrix_UB_32       0.0257467000
_diffrn_orient_matrix_UB_33       0.0456880000
_diffrn_radiation_monochromator   graphite
_diffrn_radiation_type            MoK\a
_diffrn_radiation_wavelength      0.71073
_diffrn_source                    'Enhance (Mo) X-ray Source'
_diffrn_standards_decay_%         ?
_diffrn_standards_interval_count  ?
_diffrn_standards_interval_time   ?
_diffrn_standards_number          ?
_reflns_number_gt                 2522
_reflns_number_total              3642
_reflns_odcompleteness_completeness 99.54
_reflns_odcompleteness_iscentric  1
_reflns_odcompleteness_theta      26.32
_reflns_threshold_expression      >2sigma(I)
_computing_cell_refinement
;
CrysAlisPro, Agilent Technologies,
Version 1.171.35.11 (release 16-05-2011 CrysAlis171 .NET)
(compiled May 16 2011,17:55:39)
;
_computing_data_collection
;
CrysAlisPro, Agilent Technologies,
Version 1.171.35.11 (release 16-05-2011 CrysAlis171 .NET)
(compiled May 16 2011,17:55:39)
;
_computing_data_reduction
;
CrysAlisPro, Agilent Technologies,
Version 1.171.35.11 (release 16-05-2011 CrysAlis171 .NET)
(compiled May 16 2011,17:55:39)
;
_computing_molecular_graphics     'Olex2 (Dolomanov et al., 2009)'
_computing_publication_material   'Olex2 (Dolomanov et al., 2009)'
_computing_structure_refinement   'ShelXL (Sheldrick, 2008)'
_computing_structure_solution     'ShelXS (Sheldrick, 2008)'
_refine_diff_density_max          0.252
_refine_diff_density_min          -0.287
_refine_diff_density_rms          0.050
_refine_ls_extinction_coef        ?
_refine_ls_extinction_method      none
_refine_ls_goodness_of_fit_ref    1.024
_refine_ls_hydrogen_treatment     constr
_refine_ls_matrix_type            full
_refine_ls_number_parameters      273
_refine_ls_number_reflns          3642
_refine_ls_number_restraints      0
_refine_ls_R_factor_all           0.0803
_refine_ls_R_factor_gt            0.0517
_refine_ls_restrained_S_all       1.024
_refine_ls_shift/su_max           0.000
_refine_ls_shift/su_mean          0.000
_refine_ls_structure_factor_coef  Fsqd
_refine_ls_weighting_details
'calc w=1/[\s^2^(Fo^2^)+(0.0671P)^2^+0.2684P] where P=(Fo^2^+2Fc^2^)/3'
_refine_ls_weighting_scheme       calc
_refine_ls_wR_factor_gt           0.1267
_refine_ls_wR_factor_ref          0.1494
_refine_special_details
;
 Refinement of F^2^ against ALL reflections.  The weighted R-factor wR and 
 goodness of fit S are based on F^2^, conventional R-factors R are based 
 on F, with F set to zero for negative F^2^. The threshold expression of 
 F^2^ > 2sigma(F^2^) is used only for calculating R-factors(gt) etc. and is 
 not relevant to the choice of reflections for refinement.  R-factors based 
 on F^2^ are statistically about twice as large as those based on F, and R- 
 factors based on ALL data will be even larger. 
;
_olex2_refinement_description
;
1. Fixed Uiso
 At 1.2 times of:
  All C(H) groups, All C(H,H) groups, All N(H) groups
 At 1.5 times of:
  All C(H,H,H) groups
2. Others
 Sof(Cl6A)=Sof(Cl5A)=Sof(C18A)=Sof(H18A)=Sof(Cl7A)=1-FVAR(1)
 Sof(Cl5)=Sof(Cl7)=Sof(Cl6)=Sof(C18)=Sof(H18)=FVAR(1)
3.a Ternary CH refined with riding coordinates:
 C13(H13), C18(H18), C18A(H18A)
3.b Secondary CH2 refined with riding coordinates:
 C16(H16A,H16B)
3.c Aromatic/amide H refined with riding coordinates:
 N1(H1), C11(H11), C8(H8), C5(H5), C4(H4), C9(H9), C2(H2), C3(H3)
3.d Idealised Me refined as rotating group:
 C17(H17A,H17B,H17C)
;
_atom_sites_solution_hydrogens    geom
_atom_sites_solution_primary      direct
_atom_sites_solution_secondary    difmap
loop_
  _atom_site_label
  _atom_site_type_symbol
  _atom_site_fract_x
  _atom_site_fract_y
  _atom_site_fract_z
  _atom_site_U_iso_or_equiv
  _atom_site_adp_type
  _atom_site_occupancy
  _atom_site_calc_flag
  _atom_site_disorder_assembly
  _atom_site_disorder_group
  _atom_site_refinement_flags_posn
 Cl1 Cl 0.41489(12) -0.20103(7) 0.15091(8) 0.0742(3) Uani 1 d . . .
 O1 O 0.6396(2) 0.36690(15) -0.00431(16) 0.0458(5) Uani 1 d . . .
 N1 N 0.4763(3) 0.37344(17) 0.15066(18) 0.0401(5) Uani 1 d . . .
 H1 H 0.4198 0.4416 0.1020 0.048 Uiso 1 calc . . R
 C6 C 0.4085(3) 0.2120(2) 0.3450(2) 0.0354(5) Uani 1 d . . .
 C14 C 0.5956(3) 0.3153(2) 0.1008(2) 0.0374(6) Uani 1 d . . .
 C7 C 0.4133(3) 0.1106(2) 0.2965(2) 0.0367(5) Uani 1 d . . .
 C1 C 0.4328(3) 0.3355(2) 0.2742(2) 0.0363(5) Uani 1 d . . .
 C11 C 0.5369(3) -0.0018(2) 0.1719(2) 0.0444(6) Uani 1 d . . .
 H11 H 0.6196 -0.0124 0.1188 0.053 Uiso 1 calc . . R
 O3 O 0.8386(2) 0.28325(19) 0.2643(2) 0.0637(6) Uani 1 d . . .
 C12 C 0.5369(3) 0.0948(2) 0.2159(2) 0.0367(6) Uani 1 d . . .
 C8 C 0.2910(3) 0.0264(2) 0.3311(2) 0.0459(6) Uani 1 d . . .
 H8 H 0.2085 0.0348 0.3853 0.055 Uiso 1 calc . . R
 Cl5 Cl 0.0487(6) 0.2806(8) -0.2265(5) 0.141(2) Uani 0.597(13) d A 1 .
 C13 C 0.6724(3) 0.1820(2) 0.1768(2) 0.0378(6) Uani 1 d . . .
 H13 H 0.7463 0.1525 0.1232 0.045 Uiso 1 calc . . R
 C10 C 0.4136(4) -0.0812(2) 0.2077(3) 0.0496(7) Uani 1 d . . .
 C5 C 0.3686(3) 0.1866(3) 0.4668(2) 0.0450(6) Uani 1 d . . .
 H5 H 0.3563 0.1045 0.5170 0.054 Uiso 1 calc . . R
 C15 C 0.7859(3) 0.1735(3) 0.2820(3) 0.0445(6) Uani 1 d . . .
 C4 C 0.3472(4) 0.2802(3) 0.5137(3) 0.0555(7) Uani 1 d . . .
 H4 H 0.3220 0.2609 0.5947 0.067 Uiso 1 calc . . R
 C9 C 0.2905(4) -0.0681(2) 0.2867(3) 0.0514(7) Uani 1 d . . .
 H9 H 0.2079 -0.1225 0.3099 0.062 Uiso 1 calc . . R
 O2 O 0.8278(3) 0.0789(2) 0.3658(2) 0.0748(7) Uani 1 d . . .
 C2 C 0.4057(3) 0.4299(2) 0.3211(3) 0.0490(7) Uani 1 d . . .
 H2 H 0.4164 0.5125 0.2718 0.059 Uiso 1 calc . . R
 Cl7 Cl 0.1070(4) 0.1681(5) 0.0338(4) 0.1274(19) Uani 0.597(13) d A 1 .
 C3 C 0.3632(4) 0.4021(3) 0.4401(3) 0.0565(8) Uani 1 d . . .
 H3 H 0.3453 0.4660 0.4708 0.068 Uiso 1 calc . . R
 Cl6 Cl 0.1325(9) 0.4263(4) -0.0888(5) 0.159(2) Uani 0.597(13) d A 1 .
 C16 C 0.9518(4) 0.2908(4) 0.3576(4) 0.0838(11) Uani 1 d . . .
 H16A H 1.0011 0.2067 0.4088 0.101 Uiso 1 calc . . R
 H16B H 1.0440 0.3380 0.3191 0.101 Uiso 1 calc . . R
 C17 C 0.8570(5) 0.3521(4) 0.4315(4) 0.0890(12) Uani 1 d . . .
 H17A H 0.8089 0.4355 0.3808 0.133 Uiso 1 calc . . GR
 H17B H 0.9327 0.3569 0.4914 0.133 Uiso 1 calc . . GR
 H17C H 0.7673 0.3043 0.4708 0.133 Uiso 1 calc . . GR
 C18 C 0.028(2) 0.2919(15) -0.0829(11) 0.079(5) Uani 0.597(13) d A 1 .
 H18 H -0.0933 0.3103 -0.0702 0.095 Uiso 0.597(13) calc A 1 R
 Cl6A Cl 0.1613(9) 0.343(2) -0.0267(17) 0.244(9) Uani 0.403(13) d A 2 .
 Cl5A Cl 0.0441(13) 0.3175(12) -0.2303(7) 0.155(4) Uani 0.403(13) d A 2 .
 C18A C 0.021(3) 0.301(3) -0.092(2) 0.141(13) Uani 0.403(13) d A 2 .
 H18A H -0.0932 0.3368 -0.0798 0.170 Uiso 0.403(13) calc A 2 R
 Cl7A Cl 0.0496(14) 0.1180(10) -0.0117(10) 0.172(5) Uani 0.403(13) d A 2 .

loop_
  _atom_site_aniso_label
  _atom_site_aniso_U_11
  _atom_site_aniso_U_22
  _atom_site_aniso_U_33
  _atom_site_aniso_U_23
  _atom_site_aniso_U_13
  _atom_site_aniso_U_12
 Cl1 0.1084(7) 0.0496(5) 0.0788(6) -0.0350(4) 0.0087(5) -0.0271(4)
 O1 0.0617(11) 0.0342(9) 0.0389(10) -0.0107(8) 0.0129(9) -0.0066(8)
 N1 0.0483(12) 0.0293(11) 0.0353(11) -0.0059(9) 0.0025(10) 0.0033(9)
 C6 0.0295(12) 0.0383(13) 0.0359(13) -0.0122(11) 0.0009(10) -0.0002(10)
 C14 0.0426(13) 0.0340(13) 0.0388(14) -0.0158(11) 0.0061(11) -0.0093(10)
 C7 0.0380(12) 0.0325(13) 0.0351(13) -0.0082(11) -0.0016(11) -0.0011(10)
 C1 0.0352(12) 0.0370(13) 0.0360(13) -0.0142(11) 0.0006(10) -0.0003(10)
 C11 0.0551(15) 0.0332(13) 0.0430(15) -0.0129(12) 0.0026(12) -0.0027(11)
 O3 0.0520(11) 0.0570(13) 0.0900(16) -0.0364(12) -0.0108(11) -0.0053(9)
 C12 0.0415(13) 0.0273(12) 0.0354(13) -0.0056(10) -0.0004(11) -0.0018(10)
 C8 0.0440(14) 0.0426(15) 0.0457(15) -0.0095(12) 0.0043(12) -0.0078(11)
 Cl5 0.102(2) 0.250(6) 0.129(4) -0.126(4) 0.041(2) -0.068(3)
 C13 0.0410(13) 0.0311(12) 0.0395(14) -0.0125(11) 0.0073(11) -0.0007(10)
 C10 0.0684(18) 0.0316(14) 0.0474(16) -0.0122(12) -0.0050(14) -0.0074(12)
 C5 0.0401(14) 0.0524(16) 0.0375(14) -0.0127(12) 0.0013(12) 0.0000(12)
 C15 0.0348(13) 0.0455(16) 0.0507(17) -0.0153(14) 0.0052(12) -0.0040(11)
 C4 0.0536(16) 0.075(2) 0.0395(16) -0.0260(16) 0.0027(13) 0.0007(14)
 C9 0.0565(16) 0.0405(15) 0.0540(17) -0.0102(13) 0.0008(14) -0.0170(12)
 O2 0.0661(14) 0.0711(15) 0.0660(15) 0.0017(13) -0.0199(12) -0.0137(11)
 C2 0.0545(16) 0.0412(15) 0.0555(17) -0.0240(13) 0.0071(14) -0.0028(12)
 Cl7 0.0884(17) 0.124(3) 0.107(2) 0.0223(17) 0.0036(16) 0.0102(17)
 C3 0.0585(17) 0.064(2) 0.0595(19) -0.0401(17) 0.0060(15) -0.0011(14)
 Cl6 0.217(5) 0.117(3) 0.157(3) -0.050(2) 0.011(3) -0.074(3)
 C16 0.0516(18) 0.095(3) 0.124(3) -0.064(3) -0.023(2) -0.0025(17)
 C17 0.080(2) 0.115(3) 0.086(3) -0.054(3) -0.010(2) -0.009(2)
 C18 0.070(9) 0.115(11) 0.051(6) -0.037(7) -0.005(5) 0.013(7)
 Cl6A 0.124(4) 0.42(2) 0.302(16) -0.266(18) -0.034(6) -0.018(8)
 Cl5A 0.221(8) 0.160(5) 0.070(4) -0.014(4) 0.022(4) -0.063(4)
 C18A 0.053(12) 0.132(19) 0.16(2) 0.031(14) 0.043(12) 0.009(11)
 Cl7A 0.117(5) 0.159(5) 0.170(6) -0.004(5) 0.044(4) 0.048(4)

_geom_special_details
;
 All esds (except the esd in the dihedral angle between two l.s. planes) 
 are estimated using the full covariance matrix.  The cell esds are taken 
 into account individually in the estimation of esds in distances, angles 
 and torsion angles; correlations between esds in cell parameters are only 
 used when they are defined by crystal symmetry.  An approximate (isotropic) 
 treatment of cell esds is used for estimating esds involving l.s. planes. 
;
loop_
  _geom_bond_atom_site_label_1
  _geom_bond_atom_site_label_2
  _geom_bond_distance
  _geom_bond_site_symmetry_2
  _geom_bond_publ_flag
 Cl1 C10 1.746(3) . ?
 O1 C14 1.235(3) . ?
 N1 H1 0.8600 . ?
 N1 C14 1.345(3) . ?
 N1 C1 1.419(3) . ?
 C6 C7 1.478(3) . ?
 C6 C1 1.396(3) . ?
 C6 C5 1.406(3) . ?
 C14 C13 1.520(3) . ?
 C7 C12 1.400(3) . ?
 C7 C8 1.404(3) . ?
 C1 C2 1.388(3) . ?
 C11 H11 0.9300 . ?
 C11 C12 1.393(3) . ?
 C11 C10 1.374(4) . ?
 O3 C15 1.323(3) . ?
 O3 C16 1.471(4) . ?
 C12 C13 1.511(3) . ?
 C8 H8 0.9300 . ?
 C8 C9 1.376(4) . ?
 Cl5 C18 1.763(11) . ?
 C13 H13 0.9800 . ?
 C13 C15 1.519(4) . ?
 C10 C9 1.375(4) . ?
 C5 H5 0.9300 . ?
 C5 C4 1.378(4) . ?
 C15 O2 1.189(3) . ?
 C4 H4 0.9300 . ?
 C4 C3 1.375(4) . ?
 C9 H9 0.9300 . ?
 C2 H2 0.9300 . ?
 C2 C3 1.375(4) . ?
 Cl7 C18 1.643(16) . ?
 C3 H3 0.9300 . ?
 Cl6 C18 1.823(15) . ?
 C16 H16A 0.9700 . ?
 C16 H16B 0.9700 . ?
 C16 C17 1.462(5) . ?
 C17 H17A 0.9600 . ?
 C17 H17B 0.9600 . ?
 C17 H17C 0.9600 . ?
 C18 H18 0.9800 . ?
 Cl6A C18A 1.59(3) . ?
 Cl5A C18A 1.59(3) . ?
 C18A H18A 0.9800 . ?
 C18A Cl7A 1.95(3) . ?

loop_
  _geom_angle_atom_site_label_1
  _geom_angle_atom_site_label_2
  _geom_angle_atom_site_label_3
  _geom_angle
  _geom_angle_site_symmetry_1
  _geom_angle_site_symmetry_3
  _geom_angle_publ_flag
 C14 N1 H1 116.2 . . ?
 C14 N1 C1 127.7(2) . . ?
 C1 N1 H1 116.2 . . ?
 C1 C6 C7 123.4(2) . . ?
 C1 C6 C5 117.2(2) . . ?
 C5 C6 C7 119.3(2) . . ?
 O1 C14 N1 121.4(2) . . ?
 O1 C14 C13 120.6(2) . . ?
 N1 C14 C13 118.0(2) . . ?
 C12 C7 C6 122.2(2) . . ?
 C12 C7 C8 117.9(2) . . ?
 C8 C7 C6 119.9(2) . . ?
 C6 C1 N1 122.98(19) . . ?
 C2 C1 N1 116.3(2) . . ?
 C2 C1 C6 120.6(2) . . ?
 C12 C11 H11 120.3 . . ?
 C10 C11 H11 120.3 . . ?
 C10 C11 C12 119.5(2) . . ?
 C15 O3 C16 117.9(3) . . ?
 C7 C12 C13 120.0(2) . . ?
 C11 C12 C7 120.5(2) . . ?
 C11 C12 C13 119.5(2) . . ?
 C7 C8 H8 119.3 . . ?
 C9 C8 C7 121.4(2) . . ?
 C9 C8 H8 119.3 . . ?
 C14 C13 H13 106.2 . . ?
 C12 C13 C14 111.21(19) . . ?
 C12 C13 H13 106.2 . . ?
 C12 C13 C15 112.5(2) . . ?
 C15 C13 C14 113.9(2) . . ?
 C15 C13 H13 106.2 . . ?
 C11 C10 Cl1 118.8(2) . . ?
 C11 C10 C9 121.5(2) . . ?
 C9 C10 Cl1 119.7(2) . . ?
 C6 C5 H5 119.2 . . ?
 C4 C5 C6 121.6(2) . . ?
 C4 C5 H5 119.2 . . ?
 O3 C15 C13 111.0(2) . . ?
 O2 C15 O3 124.9(3) . . ?
 O2 C15 C13 124.0(2) . . ?
 C5 C4 H4 120.1 . . ?
 C3 C4 C5 119.7(2) . . ?
 C3 C4 H4 120.1 . . ?
 C8 C9 H9 120.4 . . ?
 C10 C9 C8 119.3(2) . . ?
 C10 C9 H9 120.4 . . ?
 C1 C2 H2 119.7 . . ?
 C3 C2 C1 120.5(3) . . ?
 C3 C2 H2 119.7 . . ?
 C4 C3 C2 120.1(2) . . ?
 C4 C3 H3 120.0 . . ?
 C2 C3 H3 120.0 . . ?
 O3 C16 H16A 109.6 . . ?
 O3 C16 H16B 109.6 . . ?
 H16A C16 H16B 108.1 . . ?
 C17 C16 O3 110.5(3) . . ?
 C17 C16 H16A 109.6 . . ?
 C17 C16 H16B 109.6 . . ?
 C16 C17 H17A 109.5 . . ?
 C16 C17 H17B 109.5 . . ?
 C16 C17 H17C 109.5 . . ?
 H17A C17 H17B 109.5 . . ?
 H17A C17 H17C 109.5 . . ?
 H17B C17 H17C 109.5 . . ?
 Cl5 C18 Cl6 106.8(8) . . ?
 Cl5 C18 H18 108.0 . . ?
 Cl7 C18 Cl5 116.8(8) . . ?
 Cl7 C18 Cl6 108.9(7) . . ?
 Cl7 C18 H18 108.0 . . ?
 Cl6 C18 H18 108.0 . . ?
 Cl6A C18A Cl5A 118.7(15) . . ?
 Cl6A C18A H18A 110.7 . . ?
 Cl6A C18A Cl7A 103.4(17) . . ?
 Cl5A C18A H18A 110.7 . . ?
 Cl5A C18A Cl7A 101.9(16) . . ?
 Cl7A C18A H18A 110.7 . . ?

loop_
  _geom_torsion_atom_site_label_1
  _geom_torsion_atom_site_label_2
  _geom_torsion_atom_site_label_3
  _geom_torsion_atom_site_label_4
  _geom_torsion
  _geom_torsion_site_symmetry_1
  _geom_torsion_site_symmetry_2
  _geom_torsion_site_symmetry_3
  _geom_torsion_site_symmetry_4
  _geom_torsion_publ_flag
 Cl1 C10 C9 C8 179.8(2) . . . . ?
 O1 C14 C13 C12 -119.6(2) . . . . ?
 O1 C14 C13 C15 112.0(3) . . . . ?
 N1 C14 C13 C12 59.0(3) . . . . ?
 N1 C14 C13 C15 -69.5(3) . . . . ?
 N1 C1 C2 C3 -179.9(2) . . . . ?
 C6 C7 C12 C11 -179.9(2) . . . . ?
 C6 C7 C12 C13 0.7(4) . . . . ?
 C6 C7 C8 C9 179.3(2) . . . . ?
 C6 C1 C2 C3 3.4(4) . . . . ?
 C6 C5 C4 C3 0.7(4) . . . . ?
 C14 N1 C1 C6 -45.9(4) . . . . ?
 C14 N1 C1 C2 137.5(3) . . . . ?
 C14 C13 C15 O3 -20.2(3) . . . . ?
 C14 C13 C15 O2 163.2(2) . . . . ?
 C7 C6 C1 N1 -4.6(3) . . . . ?
 C7 C6 C1 C2 171.8(2) . . . . ?
 C7 C6 C5 C4 -174.0(2) . . . . ?
 C7 C12 C13 C14 -66.6(3) . . . . ?
 C7 C12 C13 C15 62.5(3) . . . . ?
 C7 C8 C9 C10 0.7(4) . . . . ?
 C1 N1 C14 O1 -168.9(2) . . . . ?
 C1 N1 C14 C13 12.5(4) . . . . ?
 C1 C6 C7 C12 43.0(3) . . . . ?
 C1 C6 C7 C8 -136.9(2) . . . . ?
 C1 C6 C5 C4 2.6(4) . . . . ?
 C1 C2 C3 C4 0.0(4) . . . . ?
 C11 C12 C13 C14 113.9(2) . . . . ?
 C11 C12 C13 C15 -117.0(3) . . . . ?
 C11 C10 C9 C8 -0.1(4) . . . . ?
 C12 C7 C8 C9 -0.7(4) . . . . ?
 C12 C11 C10 Cl1 179.6(2) . . . . ?
 C12 C11 C10 C9 -0.4(4) . . . . ?
 C12 C13 C15 O3 -147.9(2) . . . . ?
 C12 C13 C15 O2 35.4(3) . . . . ?
 C8 C7 C12 C11 0.1(4) . . . . ?
 C8 C7 C12 C13 -179.3(2) . . . . ?
 C10 C11 C12 C7 0.4(4) . . . . ?
 C10 C11 C12 C13 179.9(2) . . . . ?
 C5 C6 C7 C12 -140.6(2) . . . . ?
 C5 C6 C7 C8 39.5(3) . . . . ?
 C5 C6 C1 N1 178.9(2) . . . . ?
 C5 C6 C1 C2 -4.6(3) . . . . ?
 C5 C4 C3 C2 -2.0(4) . . . . ?
 C15 O3 C16 C17 -103.2(3) . . . . ?
 C16 O3 C15 C13 -179.3(2) . . . . ?
 C16 O3 C15 O2 -2.7(4) . . . . ?
